# Supplementary material for: Modification of the Dielectric and Thermal Properties of Organic Frameworks Based on Nonterminal Epoxy Liquid Crystal with Silicon Dioxide and Titanium Dioxide
Source: MDPI journal article supplement (doi:10.3390/polym16101320), 2024-05-08
Supplement: s1 [file s1]

# Modification of the Dielectric and Thermal Properties of Organic Frameworks Based on Nonterminal Epoxy Liquid Crystal with Silicon Dioxide and Titanium Dioxide

Lidia Okrasa <sup>1,\*</sup>, Magdalena Włodarska <sup>2</sup>, Maciej Kisiel <sup>3</sup> and Beata Mossety-Leszczak <sup>3</sup>

<sup>1</sup> Department of Molecular Physics, Lodz University of Technology, Żeromskiego 116, 90-924 Lodz, Poland

<sup>2</sup> Institute of Physics, Lodz University of Technology, Wólczńska 217/221, 93-005 Lodz, Poland; magdalena.wlodarska@p.lodz.pl

<sup>3</sup> Department of Industrial and Materials Chemistry, Rzeszow University of Technology, al. Powstańców Warszawy 12, 35-959 Rzeszow, Poland; m.kisiel@prz.edu.pl (M.K.); mossety@prz.edu.pl (B.M.-L.)

\* Correspondence: lidia.okrasa@p.lodz.pl

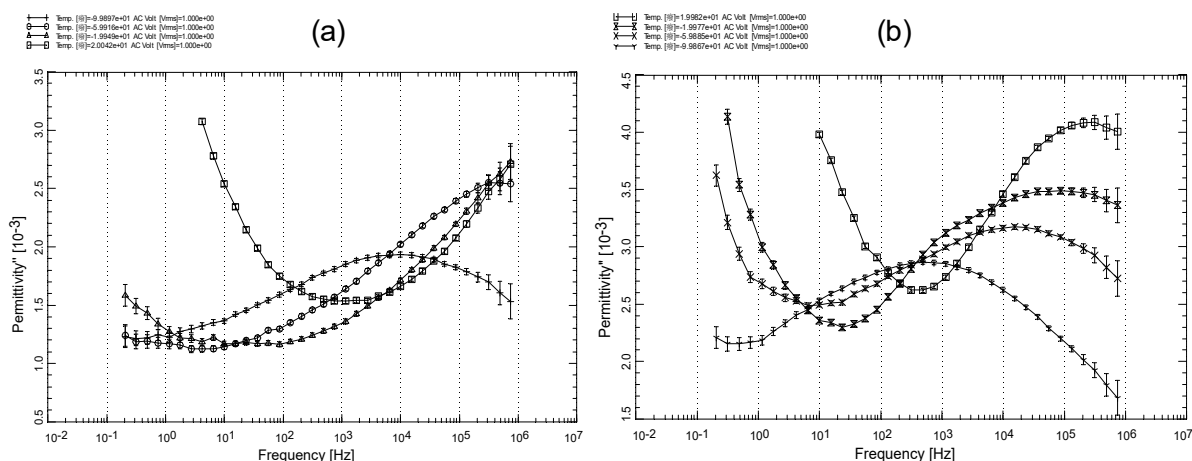

**Figure S1.** Examples of original results showing the imaginary component of complex dielectric permittivity along with measurement errors that depend on the temperature and frequency at which the measurement was made: (a) LCEN/SiO<sub>2</sub>, (b) LCEN/TiO<sub>2</sub>.

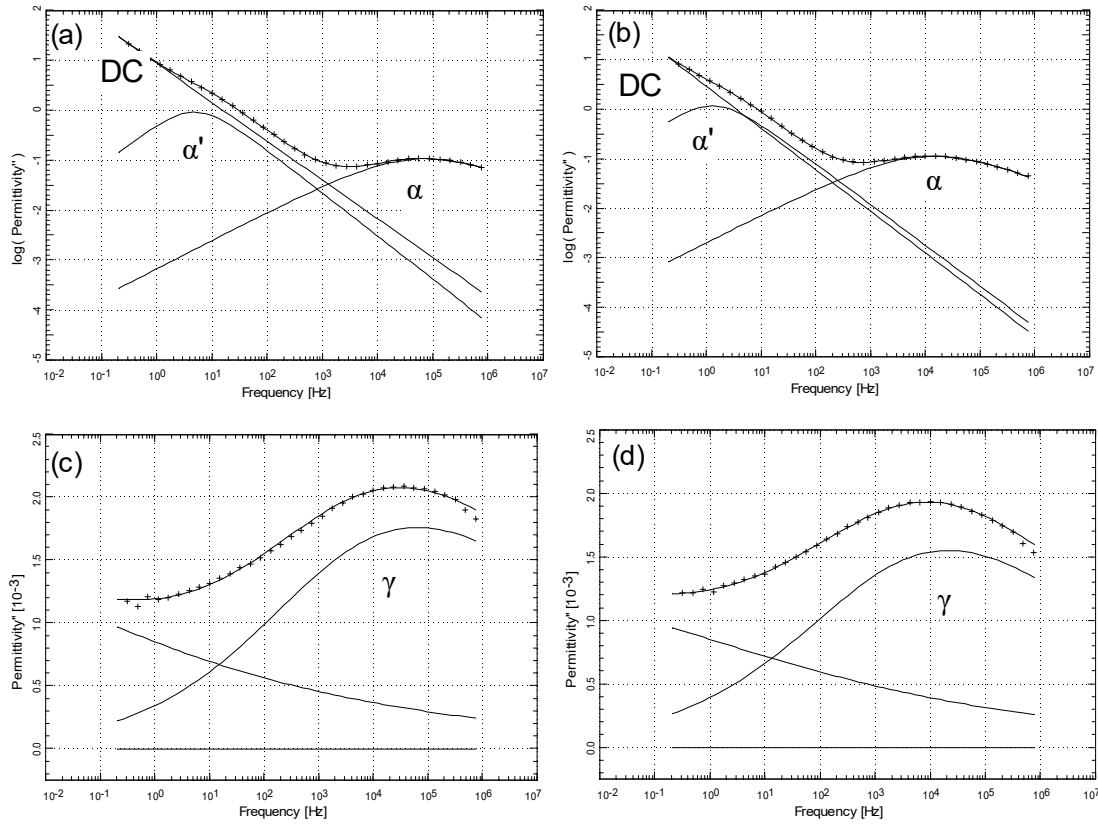

**Figure S2.** The examples of deconvolution of the imaginary component of complex dielectric permittivity (taken directly from WinFit software) for LCEN/SiO<sub>2</sub> for chosen temperatures: (a) 110°C, (b) 100°C, (c) -90°C, (d) -100°C.

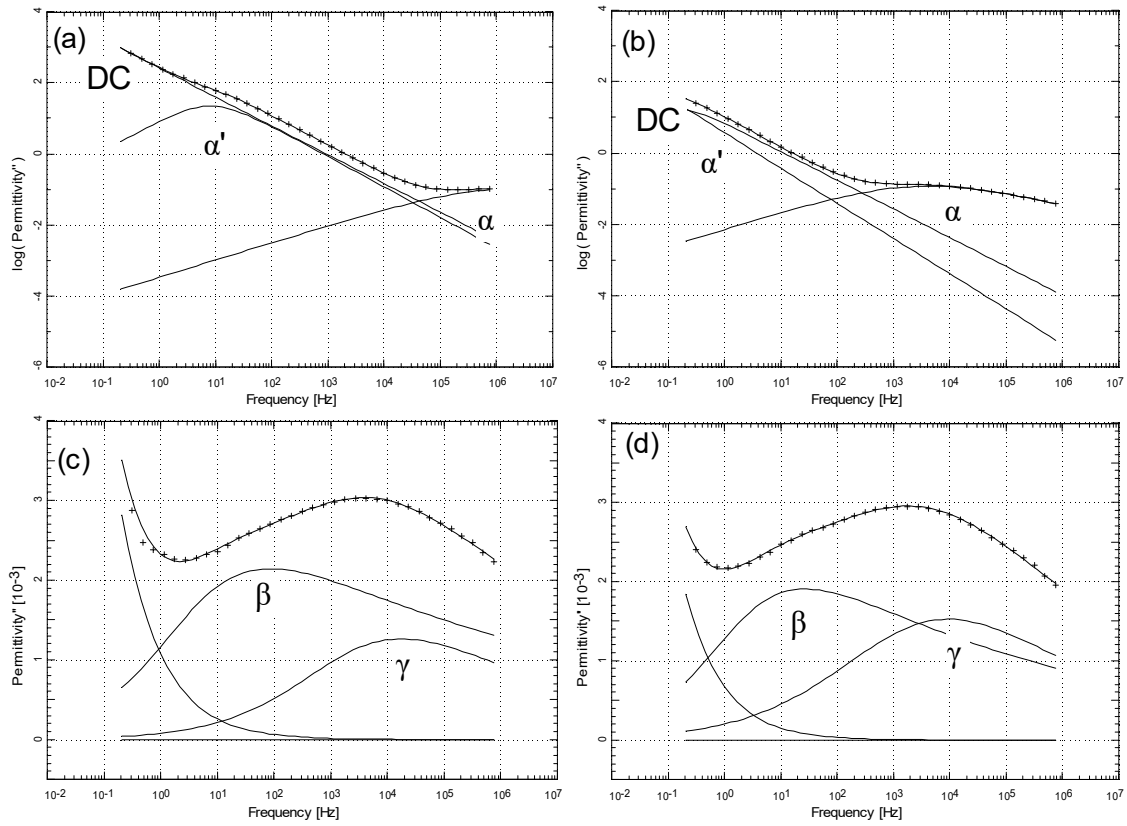

**Figure S3.** The examples of deconvolution of the imaginary component of complex dielectric permittivity (taken directly from WinFit software) for LCEN/TiO<sub>2</sub> for chosen temperatures: (a) 140°C, (b) 100°C, (c) -80°C, (d) -90°C.

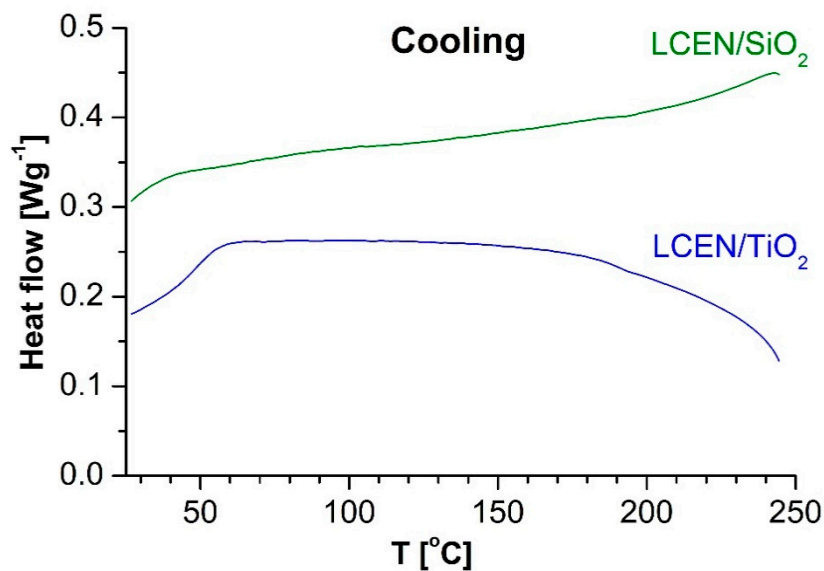

**Figure S4.** DSC thermograms for mixtures based on the investigated monomer cured with DDM and with SiO<sub>2</sub> or TiO<sub>2</sub> fillers - the cooling route occurred directly after curing process shown in Figure 1 (in main text).

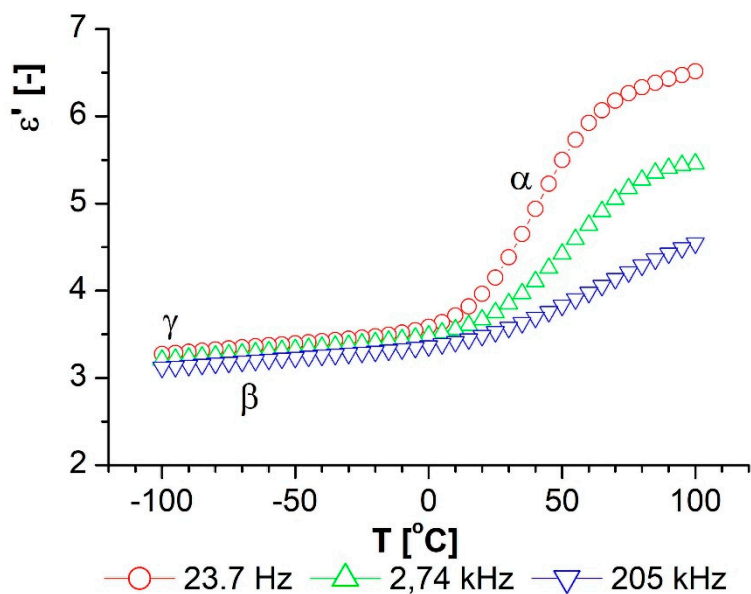

**Figure S5.** Examples of the real component of the complex dielectric permittivity at a few selected frequencies in LCEN.

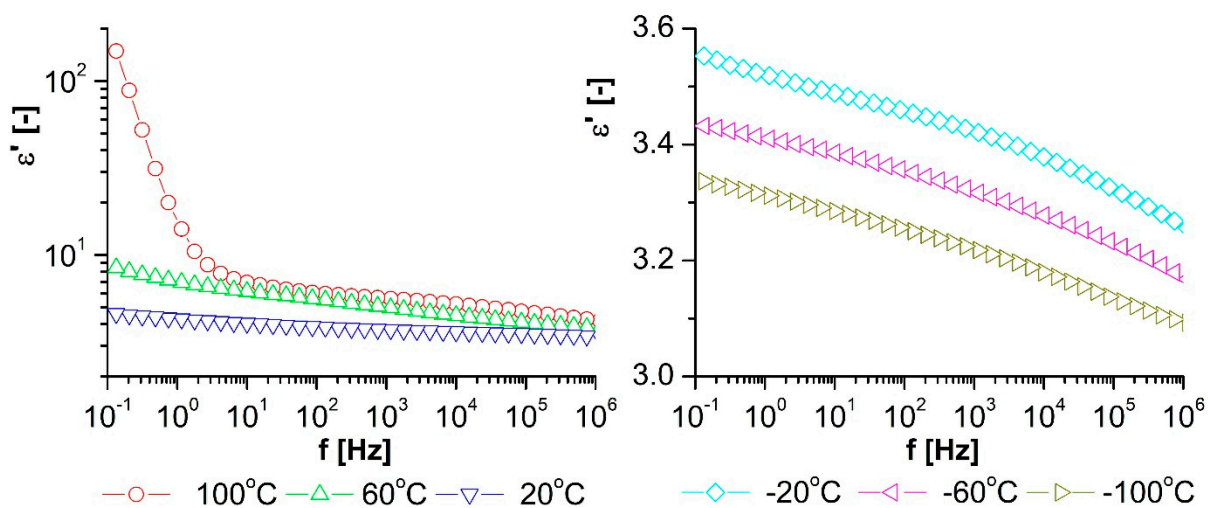

**Figure S6.** Examples of the real component of the complex dielectric permittivity at a few selected temperatures in LCEN. The plot on the right side enlarges the low-intensity region to emphasize the occurring relaxations.
